# Supplementary material for: Optimizing Oxygen-Production Kinetics of Manganese Dioxide Nanoparticles Improves Hypoxia Reversal and Survival in Mice with Bone Metastases
Source: PubMed Central journal article supplement (PMC10979454; doi:10.1021/acs.molpharmaceut.3c00671), 2024-02-16
Supplement: mp3c00671_si_001.pdf [file mp3c00671_si_001.pdf]

Optimizing oxygen-production kinetics of manganese dioxide nanoparticles improves hypoxia reversal and survival in mice with bone metastases

**Authors:** David A. Murphy, Daniela Osteicochea, Aidan Atkins, Caitlin Sannes, Zachary McClarnon, and Isaac M. Adjei\*

Department of Biomedical Engineering, Texas A&M University, College Station, TX 77843, USA

\*Corresponding author:

Isaac M. Adjei, Ph.D.

Department of Biomedical Engineering

Texas A&M University

College Station, TX 77843

Phone: 979-458-2536

Fax: 979-845-4450

Email: [adjeii@tamu.edu](mailto:adjeii@tamu.edu)

## Supplementary Information

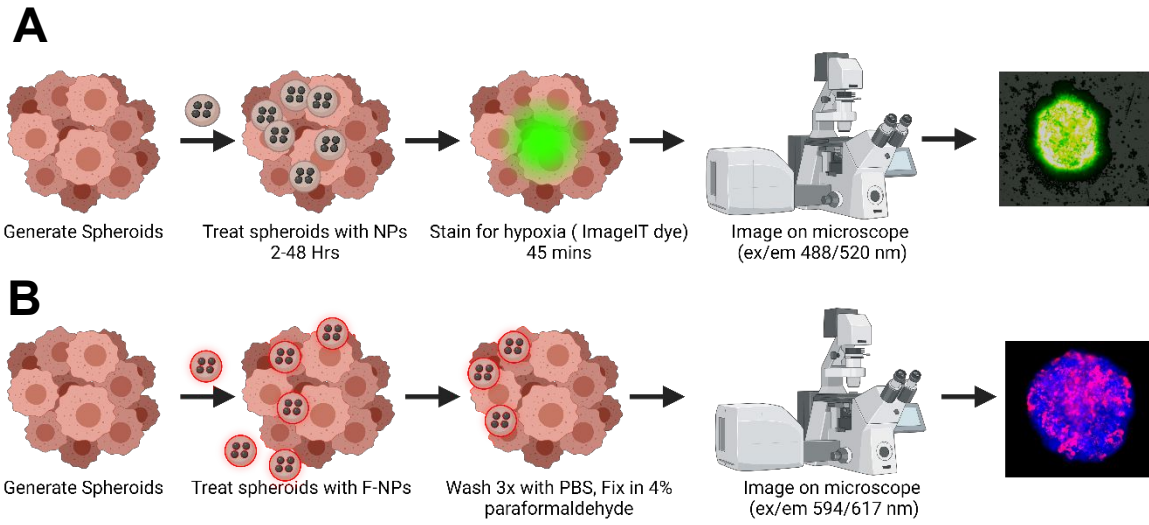

Figure S1: Schemes for imaging spheroid hypoxia (A) and NP uptake (B)

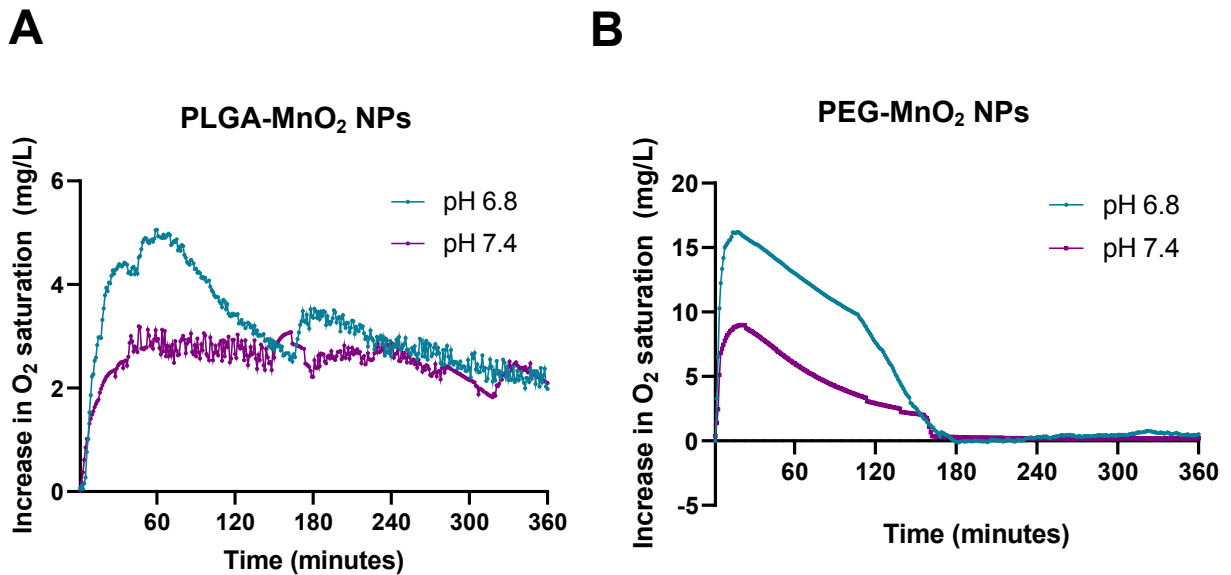

Figure S2: Increase in O<sub>2</sub> saturation in different pHs for PLGA-MnO<sub>2</sub> NPs (A) and PEG-MnO<sub>2</sub> NPs (B)

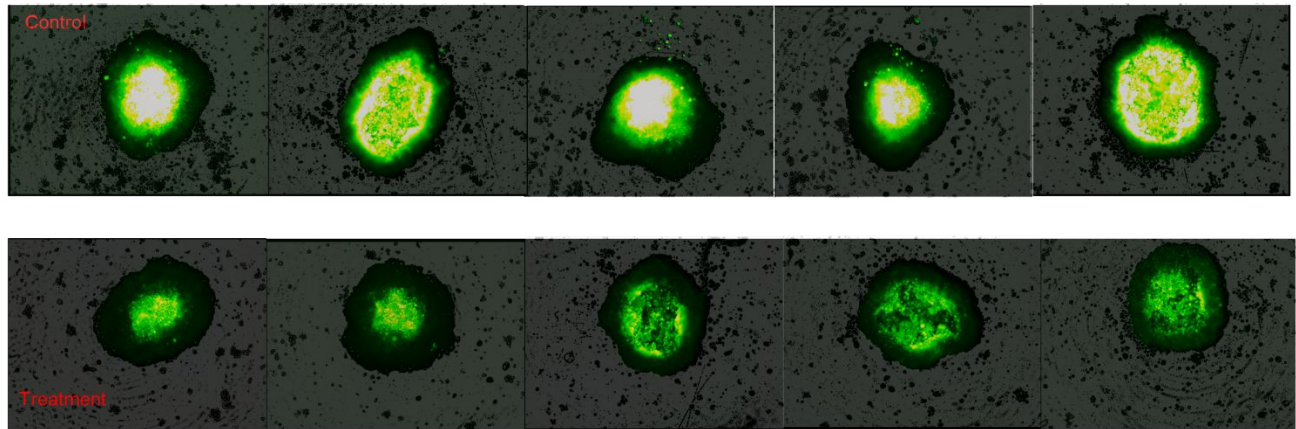

**Figure S3: Overlay of brightfield and fluorescent images showing decreasing size of hypoxic core after nanoparticle treatment.**

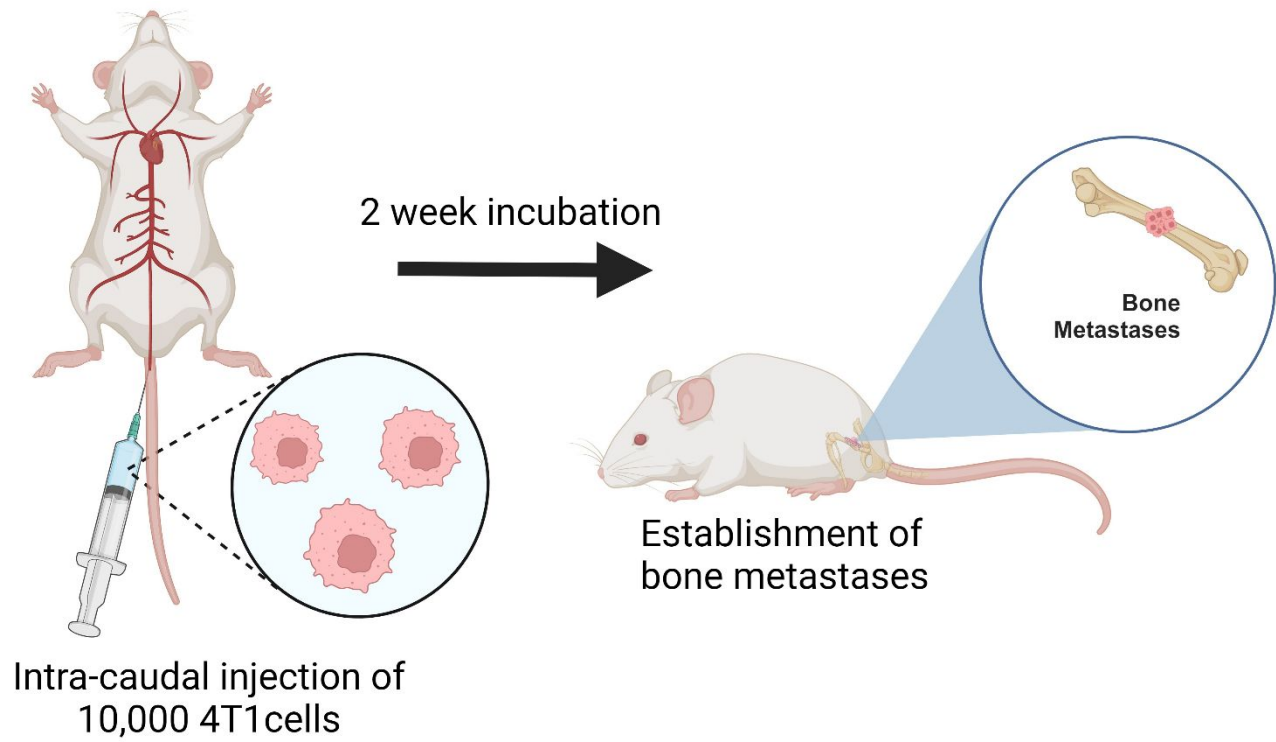

**Figure S4: Scheme of intra-caudal injection of 4T1 cells to develop an in vivo bone metastases model.**
